# Supplementary material for: Copy number variation meta-analysis reveals a novel duplication at 9p24 associated with multiple neurodevelopmental disorders
Source: PubMed Central journal article supplement (PMC5709845; doi:10.1186/s13073-017-0494-1), 2017-11-30
Supplement: 13073_2017_494_MOESM1_ESM.pdf [file 13073_2017_494_MOESM1_ESM.pdf]

**Supplemental Tables:**

**Table S1.** The quality control criteria based on CNV metrics applied to each cohort.

| <b>Disease Cohort</b>       | <b>genotyping rate</b> | <b>LRR SD</b> | <b> GCWF </b> | <b>CNV count</b> |
|-----------------------------|------------------------|---------------|---------------|------------------|
| <b>Janssen SCZ &amp; BD</b> | >98%                   | <0.3          | <0.05         | <100             |
| <b>CHOP SCZ</b>             | >96%                   | <0.35         | <0.02         | <80              |
| <b>CHOP ASD</b>             | >98%                   | <0.3          | <0.05         | <100             |
| <b>CHOP ADHD</b>            | >98%                   | <0.3          | <0.05         | <100             |
| <b>Depression</b>           | >98%                   | <0.25         | <0.02         | <100             |

LRR SD= the SD of log R ratio; |GCWF|= the absolute value of GC base pair wave factor; CNV count= CNV count per sample.

**Table S2.** The number of histone marks, DNase and eQTLs in each *DOCK8* CNVs.

| <b>Disease Cohort</b>       | <b>CNVR (hg18)</b>  | <b>H3K4me1 Enh</b> | <b>H3K4me3 Pro</b> | <b>H3K27ac Enh</b> | <b>H3K9ac Pro</b> | <b>Dnase</b> | <b>GTE<sub>x</sub></b> | <b>GRASP</b> |
|-----------------------------|---------------------|--------------------|--------------------|--------------------|-------------------|--------------|------------------------|--------------|
| <b>JANSSEN SCZ &amp; BD</b> | chr9:396118-474850  | 269                | 102                | 204                | 110               | 57           | 1                      | 1            |
| <b>CHOP SCZ</b>             | chr9:372245-389052  | 303                | 120                | 204                | 110               | 59           | 1                      | 1            |
| <b>CHOP ASD</b>             | chr9:407918-474786  | 151                | 32                 | 158                | 161               | 17           | 0                      | 0            |
| <b>CHOP ADHD</b>            | chr9: 293639-352917 | 276                | 71                 | 167                | 221               | 45           | 2                      | 1            |
| <b>Depression</b>           | chr9: 283360-294957 | 92                 | 39                 | 63                 | 0                 | 12           | 1                      | 0            |
